# Supplementary material for: Sinomonas jingmaiensis sp. nov., a potentially plant growth-promoting actinobacterium isolated from the rhizosphere soil of Pu-erh tea in Jingmai Mountain
Source: Research Square preprint supplement (doi:10.21203/rs.3.rs-7592626/v1), 2025-10-17
Supplement: Supplementary file 1 [file eeb66f747edaebad82f31470.docx]

**Sinomonas jingmaiensis sp. nov., a potentially plant growth-promoting actinobacterium isolated from the rhizosphere soil of Pu-erh tea in Jingmai Mountain.**

Huiqing Luoa, Yan Shena, Jianyang Fua, Yuanfeng Chena, Siyu Zhoua, Shikuan Zhaoa, Cheng Gongb, Xinrui Mac, Wenshu Pengd,e, Liang Yand,e*, Chongye Fanga* and Ruijuan Yanga*

a College of Food Science and Technology, Yunnan Agricultural University, Kunming 650201, China

b College of Agriculture and Biotechnology, Yunnan Agricultural University , Kunming, 650201, China

c College of Life Science and Technology, Beijing University of Chemical Technology, Beijing 100029, China

d College of Tea (Pu'er), West Yunnan University of Applied Sciences, Pu'er, Yunnan 665000, China

e  Pu'er Institute of Pu-Erh Tea, Pu'er, Yunnan 665000, China

Running title: *Sinomonas* jingmaiensis sp. nov.

Keywords:Genome; Novel species; Polyphasic taxonomy; Rhizosphere soil; *Sinomonas*

*Correspondence: Liang Yan, jacky_4680@163.com; Chongye Fang, ffccyy2@163.com; Ruijuan Yang, helen_4680@163.com

| *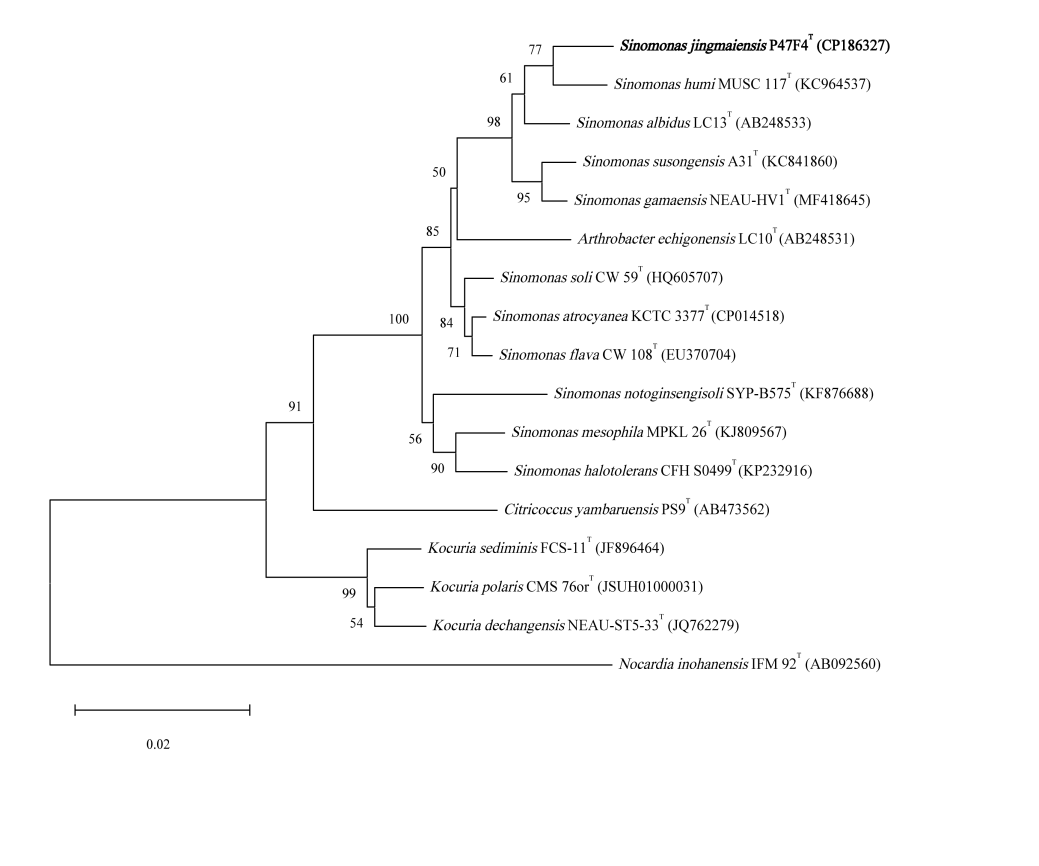* |
| --- |

**Supplementary Fig. S1** Neighbor-Joining phylogenetic tree based on the 16S rRNA gene sequences showing the taxonomic position of the novel species P47F4. Bootstrap values of 50% are shown on the branches of the tree. Species *Nocardia inohanensis* IFM 0092T (AB092560) is used as the outgroup. Bar, 0.02 substitutions per nucleotide position.

| *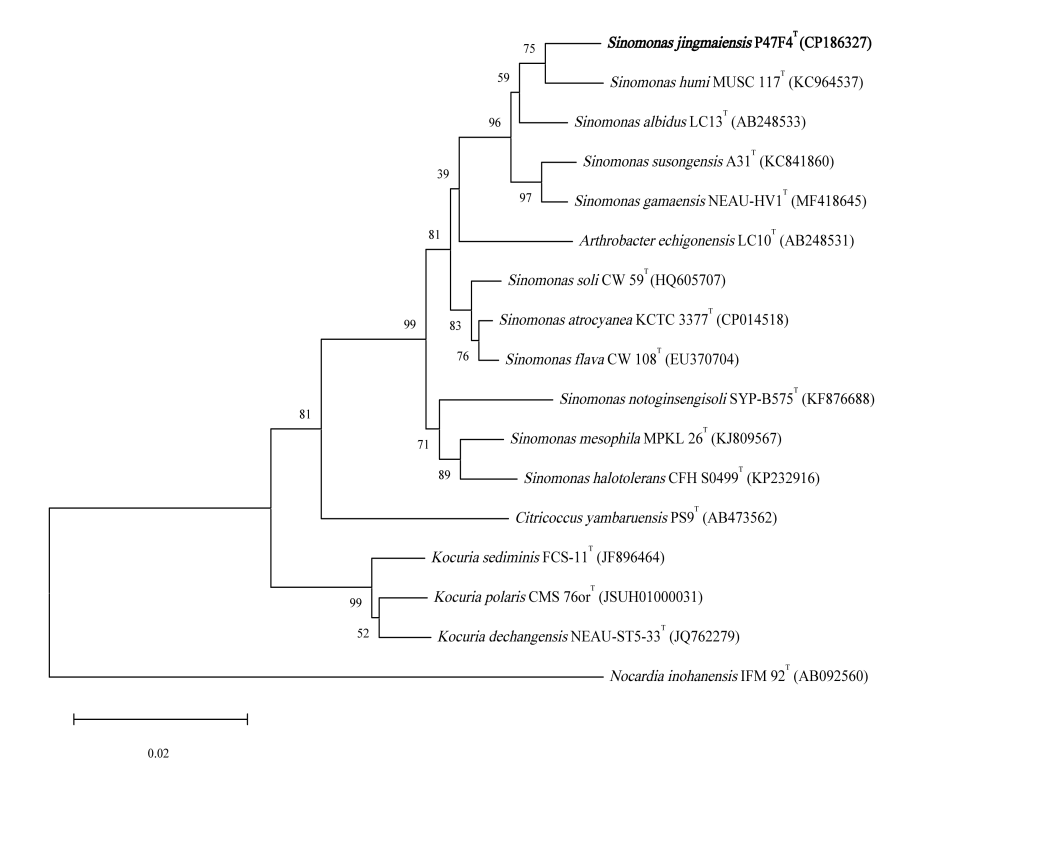* |
| --- |

**Supplementary Fig. S2.** Minimum Evolution phylogenetic tree based on the 16S rRNA gene sequences showing the taxonomic position of the novel species P47F4. Bootstrap values of 50% are shown on the branches of the tree. Species *Nocardia inohanensis* IFM 0092T (AB092560) is used as the outgroup. Bar, 0.02 substitutions per nucleotide position.

| 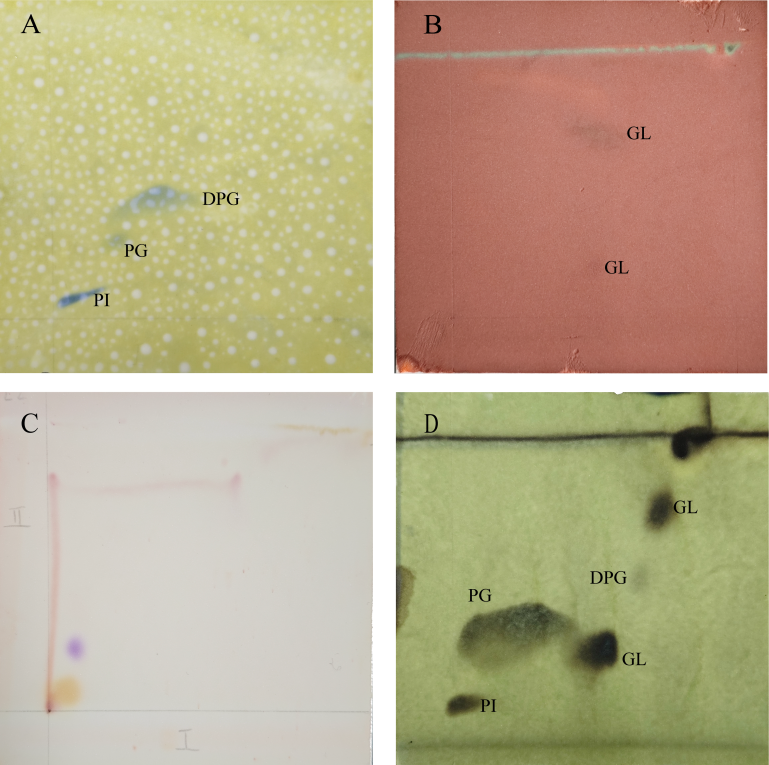  Ⅱ  Ⅱ  Ⅱ  Ⅱ  Ⅰ  Ⅰ  Ⅰ  Ⅰ |
| --- |

**Supplementary Fig. S3.** Polar lipid profile of strain P47F4 analyzed by thin-layer chromatography. Separation was performed using chloroform/ethanol/water (65:25:4, v/v/v) in the first direction and chloroform/acetic acid/methanol/water (40:7.5:6:2, v/v/v/v) in the second direction.

1. Phospholipids stained with molybdenum blue reagent, (B) Glycolipids stained with α-naphthol reagent, (C) Aminolipids stained with ninhydrin reagent, (D) Total lipids stained with phosphomolybdic acid reagent.

Abbreviations: DPG, diphosphatidylglycerol; PI, phosphatidylinositol; PG, phosphatidylglycerol; GL, glycolipid.

**Table S1.** Gene annotation ratio statistics

| **Database** | **Number of genes** | **Percentage(%)** |
| --- | --- | --- |
| Annotated in NR | 3256 | 81.2 |
| Annotated in COG | 2540 | 63.34 |
| Annotated in CDD | 1696 | 42.29 |
| Annotated in PFAM | 2412 | 60.15 |
| Annotated in GO | 617 | 15.39 |
| Annotated in KEGG | 1074 | 26.78 |
| Annotated in CAzy | 85 | 2.12 |
| Annotated in TCDB | 470 | 11.72 |
| Annotated in PHI | 668 | 16.66 |
| Annotated in VFDB_A | 206 | 5.14 |
| Annotated in VFDB_B | 440 | 10.97 |
| Annotated in CARD | 175 | 4.36 |
| Annotated in BactMet_exp | 180 | 4.49 |
| Annotated in BactMet_pre | 278 | 6.93 |
| Annotated in SARG | 29 | 0.72 |
| Annotated in at least one database | 3379 | 84.26 |
| Annotated in all database | 0 | 0 |
| Total genes | 4010 | 100 |

**Table S2.** Genome statistics of strain P47F4

| Attribute | Value | Explanation |
| --- | --- | --- |
| Clean data GC (%) | 66.82 | GC content of valid data |
| Clean data Q20 (%) | 97.84 | Q20 value of valid data. |
| Clean data Q30 (%) | 94.60 | Q30 value of valid data. |
| Total num (>500bp) | 1 | Number of Scaffolds above 500 bp, or number of Contigs in Scaffolds above 500 bp. |
| Total length (bp) | 4439314 | Total length of the Scaffold or Contig mentioned above. |
| N50 length (bp) | 4439314 | N50 length of the Scaffold or Contig mentioned above. |
| N90 length (bp) | 4439314 | N90 length of the Scaffold or Contig mentioned above. |
| Max length (bp) | 4113990 | Maximum length of the Scaffold or Contig mentioned above. |
| Min length (bp) | 4106309 | Minimum length of the Scaffold or Contig mentioned above. |
| Sequence GC (%) | 69.4 | GC content of Assembly Sequence |
| Coding gene |  |  |
| Genome size (bp) | 4439314 | - |
| Gene number | 1 | - |
| Gene total length (bp) | 4439314 | - |
| Gene  average length (bp) | 4439314 | - |
| Feature Type | Gene number | Total length(bp) |
| tRNA | 52 | 3944 |
| rRNA | 12 | 19052 |

**Table S3.** Genes of strain P47F4 potentially associated with the Carbohydrate-Active enZYmes (CAZy) database.

| CAZy Activities | Gene count |
| --- | --- |
| Laccase / p-diphenol:oxygen oxidoreductase / ferroxidase (EC 1.10.3.2); ; ferroxidase (EC 1.10.3.-); Laccase-like multicopper oxidase (EC 1.10.3.-) | 3 |
| cellobiose dehydrogenase (EC 1.1.99.18); glucose 1-oxidase (EC 1.1.3.4); aryl alcohol oxidase (EC 1.1.3.7); alcohol oxidase (EC 1.1.3.13); pyranose oxidase (EC 1.1.3.10) | 2 |
| vanillyl-alcohol oxidase (EC 1.1.3.38) | 2 |
| glucooligosaccharide oxidase (EC 1.1.3.-); chitooligosaccharide oxidase (EC 1.1.3.-) | 3 |
| acetyl xylan esterase (EC 3.1.1.72); cinnamoyl esterase (EC 3.1.1.-); feruloyl esterase (EC 3.1.1.73); carboxylesterase (EC 3.1.1.1); S-formylglutathione hydrolase (EC 3.1.2.12); diacylglycerol O-acyltransferase (EC 2.3.1.20); trehalose 6-O-mycolyltransferase (EC 2.3.1.122) | 6 |
| arylesterase (EC 3.1.1.-); carboxyl esterase (EC 3.1.1.3); acetylcholinesterase (EC 3.1.1.7); cholinesterase (EC 3.1.1.8); sterol esterase (EC 3.1.1.13); brefeldin A esterase (EC 3.1.1.-). | 2 |
| pectin acetylesterase (EC 3.1.1.-); rhamnogalacturonan acetylesterase (EC 3.1.1.-); acetyl xylan esterase (EC 3.1.1.72) | 1 |
| acetyl xylan esterase (EC 3.1.1.72). | 2 |
| acetyl xylan esterase (EC 3.1.1.72); cephalosporin-C deacetylase (EC 3.1.1.41). | 2 |
| N-acetylglucosamine 6-phosphate deacetylase (EC 3.5.1.25); N-acetylglucosamine 6-phosphate deacetylase (EC 3.5.1.80) | 3 |
| beta-glucosidase (EC 3.2.1.21); beta-galactosidase (EC 3.2.1.23); beta-mannosidase (EC 3.2.1.25); beta-glucuronidase (EC 3.2.1.31); beta-xylosidase (EC 3.2.1.37); beta-D-fucosidase (EC 3.2.1.38); phlorizin hydrolase (EC 3.2.1.62); exo-beta-1,4-glucanase (EC 3.2.1.74); 6-phospho-beta-galactosidase (EC 3.2.1.85); 6-phospho-beta-glucosidase (EC 3.2.1.86); strictosidine beta-glucosidase (EC 3.2.1.105); lactase (EC 3.2.1.108); amygdalin beta-glucosidase (EC 3.2.1.117); prunasin beta-glucosidase (EC 3.2.1.118); vicianin hydrolase (EC 3.2.1.119); raucaffricine beta-glucosidase (EC 3.2.1.125); thioglucosidase (EC 3.2.1.147); beta-primeverosidase (EC 3.2.1.149); isoflavonoid 7-O-beta-apiosyl-beta-glucosidase (EC 3.2.1.161); ABA-specific beta-glucosidase (EC 3.2.1.175); DIMBOA beta-glucosidase (EC 3.2.1.182); beta-glycosidase (EC 3.2.1.-); hydroxyisourate hydrolase (EC 3.-.-.-) | 2 |
| alpha-amylase (EC 3.2.1.1); pullulanase (EC 3.2.1.41); cyclomaltodextrin glucanotransferase (EC 2.4.1.19); cyclomaltodextrinase (EC 3.2.1.54); trehalose-6-phosphate hydrolase (EC 3.2.1.93); oligo-alpha-glucosidase (EC 3.2.1.10); maltogenic amylase (EC 3.2.1.133); neopullulanase (EC 3.2.1.135); alpha-glucosidase (EC 3.2.1.20); maltotetraose-forming alpha-amylase (EC 3.2.1.60); isoamylase (EC 3.2.1.68); glucodextranase (EC 3.2.1.70); maltohexaose-forming alpha-amylase (EC 3.2.1.98); maltotriose-forming alpha-amylase (EC 3.2.1.116); branching enzyme (EC 2.4.1.18); trehalose synthase (EC 5.4.99.16); 4-alpha-glucanotransferase (EC 2.4.1.25); maltopentaose-forming alpha-amylase (EC 3.2.1.-) ; amylosucrase (EC 2.4.1.4) ; sucrose phosphorylase (EC 2.4.1.7); malto-oligosyltrehalose trehalohydrolase (EC 3.2.1.141); isomaltulose synthase (EC 5.4.99.11); malto-oligosyltrehalose synthase (EC 5.4.99.15); amylo-alpha-1,6-glucosidase (EC 3.2.1.33); alpha-1,4-glucan: phosphate alpha-maltosyltransferase (EC 2.4.99.16); 6?-P-sucrose phosphorylase (EC 2.4.1.-); amino acid transporter | 10 |
| glucoamylase (EC 3.2.1.3); glucodextranase (EC 3.2.1.70); alpha,alpha-trehalase (EC 3.2.1.28); dextran dextrinase (EC 2.4.1.2) | 2 |
| beta-galactosidase (EC 3.2.1.23) ; beta-mannosidase (EC 3.2.1.25); beta-glucuronidase (EC 3.2.1.31); alpha-L-arabinofuranosidase (EC 3.2.1.55); mannosylglycoprotein endo-beta-mannosidase (EC 3.2.1.152); exo-beta-glucosaminidase (EC 3.2.1.165) | 4 |
| beta-glucosidase (EC 3.2.1.21); xylan 1,4-beta-xylosidase (EC 3.2.1.37); beta-glucosylceramidase (EC 3.2.1.45); beta-N-acetylhexosaminidase (EC 3.2.1.52); alpha-L-arabinofuranosidase (EC 3.2.1.55); glucan 1,3-beta-glucosidase (EC 3.2.1.58); glucan 1,4-beta-glucosidase (EC 3.2.1.74); isoprimeverose-producing oligoxyloglucan hydrolase (EC 3.2.1.120); coniferin beta-glucosidase (EC 3.2.1.126); exo-1,3-1,4-glucanase (EC 3.2.1.-); beta-N-acetylglucosaminide phosphorylases (EC 2.4.1.-) | 1 |
| alpha-glucosidase (EC 3.2.1.20); alpha-galactosidase (EC 3.2.1.22); alpha-mannosidase (EC 3.2.1.24); alpha-1,3-glucosidase (EC 3.2.1.84); sucrase-isomaltase (EC 3.2.1.48) (EC 3.2.1.10); alpha-xylosidase (EC 3.2.1.177); alpha-glucan lyase (EC 4.2.2.13); isomaltosyltransferase (EC 2.4.1.-); oligosaccharide alpha-1,4-glucosyltransferase (EC 2.4.1.161); sulfoquinovosidase (EC 3.2.1.-) | 2 |
| invertase (EC 3.2.1.26); endo-inulinase (EC 3.2.1.7); beta-2,6-fructan 6-levanbiohydrolase (EC 3.2.1.64); endo-levanase (EC 3.2.1.65); exo-inulinase (EC 3.2.1.80); fructan beta-(2,1)-fructosidase/1-exohydrolase (EC 3.2.1.153); fructan beta-(2,6)-fructosidase/6-exohydrolase (EC 3.2.1.154); sucrose:sucrose 1-fructosyltransferase (EC 2.4.1.99); fructan:fructan 1-fructosyltransferase (EC 2.4.1.100); sucrose:fructan 6-fructosyltransferase (EC 2.4.1.10); fructan:fructan 6G-fructosyltransferase (EC 2.4.1.243); levan fructosyltransferase (EC 2.4.1.-); [retaining] sucrose:sucrose 6-fructosyltransferase (6-SST) (EC 2.4.1.-); cycloinulo-oligosaccharide fructanotransferase (EC 2.4.1.-) | 3 |
| beta-galactosidase (EC 3.2.1.23); exo-beta-glucosaminidase (EC 3.2.1.165); exo-beta-1,4-galactanase (EC 3.2.1.-); beta-1,3-galactosidase (EC 3.2.1.-) | 1 |
| alpha-galactosidase (EC 3.2.1.22); alpha-N-acetylgalactosaminidase (EC 3.2.1.49); stachyose synthase (EC 2.4.1.67); raffinose synthase (EC 2.4.1.82) | 2 |
| beta-galactosidase (EC 3.2.1.23); alpha-L-arabinopyranosidase (EC 3.2.1.-) | 1 |
| beta-xylosidase (EC 3.2.1.37); alpha-L-arabinofuranosidase (EC 3.2.1.55); arabinanase (EC 3.2.1.99); xylanase (EC 3.2.1.8); galactan 1,3-beta-galactosidase (EC 3.2.1.145); alpha-1,2-L-arabinofuranosidase (EC 3.2.1.-); exo-alpha-1,5-L-arabinofuranosidase (EC 3.2.1.-); [inverting] exo-alpha-1,5-L-arabinanase (EC 3.2.1.-); beta-1,3-xylosidase (EC 3.2.1.-) | 1 |
| endoglucanase (EC 3.2.1.4); endo-beta-1,4-xylanase (EC 3.2.1.8); beta-xylosidase (EC 3.2.1.37); alpha-L-arabinofuranosidase (EC 3.2.1.55) | 1 |
| alpha,alpha-trehalase (EC 3.2.1.28); maltose phosphorylase (EC 2.4.1.8); trehalose phosphorylase (EC 2.4.1.64); kojibiose phosphorylase (EC 2.4.1.230); trehalose-6-phosphate phosphorylase (EC 2.4.1.216); nigerose phosphorylase (EC 2.4.1.279); 3-O-alpha-glucopyranosyl-L-rhamnose phosphorylase (EC 2.4.1.282); 2-O-alpha-glucopyranosylglycerol: phosphate beta-glucosyltransferase (EC 2.4.1.-); alpha-glucosyl-1,2-beta-galactosyl-L-hydroxylysine alpha-glucosidase (EC 3.2.1.107) | 1 |
| cycloisomaltooligosaccharide glucanotransferase (EC 2.4.1.248); dextranase (EC 3.2.1.11). | 1 |
| alpha-1,6-mannanase (EC 3.2.1.101) | 1 |
| amylomaltase or 4-alpha-glucanotransferase (EC 2.4.1.25) | 1 |
| alpha-L-rhamnosidase (EC 3.2.1.40) | 4 |
| inulin lyase [DFA-I-forming] (EC 4.2.2.17); inulin lyase [DFA-III-forming] (EC 4.2.2.18); difructofuranose 1,2':2,3' dianhydride hydrolase [DFA-IIIase] (EC 3.2.1.-) | 1 |
| alpha-L-fucosidase (EC 3.2.1.51); alpha-1,2-L-fucosidase (EC 3.2.1.63); alpha-L-galactosidase (EC 3.2.1.-) | 1 |
| cellulose synthase (EC 2.4.1.12); chitin synthase (EC 2.4.1.16); dolichyl-phosphate beta-D-mannosyltransferase (EC 2.4.1.83); dolichyl-phosphate beta-glucosyltransferase (EC 2.4.1.117); N-acetylglucosaminyltransferase (EC 2.4.1.-); N-acetylgalactosaminyltransferase (EC 2.4.1.-); hyaluronan synthase (EC 2.4.1.212); chitin oligosaccharide synthase (EC 2.4.1.-); beta-1,3-glucan synthase (EC 2.4.1.34); beta-1,4-mannan synthase (EC 2.4.1.-); beta-mannosylphosphodecaprenol-mannooligosaccharide alpha-1,6-mannosyltransferase (EC 2.4.1.199); UDP-Galf: rhamnopyranosyl-N-acetylglucosaminyl-PP-decaprenol beta-1,4/1,5-galactofuranosyltransferase (EC 2.4.1.287); UDP-Galf: galactofuranosyl-galactofuranosyl-rhamnosyl-N-acetylglucosaminyl-PP-decaprenol beta-1,5/1,6-galactofuranosyltransferase (EC 2.4.1.288); dTDP-L-Rha: N-acetylglucosaminyl-PP-decaprenol alpha-1,3-L-rhamnosyltransferase (EC 2.4.1.289) | 4 |
| alpha,alpha-trehalose-phosphate synthase [UDP-forming] (EC 2.4.1.15); Glucosylglycerol-phosphate synthase (EC 2.4.1.213); trehalose-6-P phosphatase (EC 3.1.3.12); [retaining] GDP-valeniol: validamine 7-phosphate valeniolyltransferase (EC 2.-.-.-) | 1 |
| 1,2-diacylglycerol 3-beta-galactosyltransferase (EC 2.4.1.46); 1,2-diacylglycerol 3-beta-glucosyltransferase (EC 2.4.1.157); UDP-GlcNAc: Und-PP-MurAc-pentapeptide beta-N-acetylglucosaminyltransferase (EC 2.4.1.227); digalactosyldiacylglycerol synthase (EC 2.4.1.241) | 1 |
| glycogen or starch phosphorylase (EC 2.4.1.1). | 1 |
| Dol-P-Man: protein alpha-mannosyltransferase (EC 2.4.1.109) | 1 |
| sucrose synthase (EC 2.4.1.13); sucrose-phosphate synthase (EC 2.4.1.14); alpha-glucosyltransferase (EC 2.4.1.52); lipopolysaccharide N-acetylglucosaminyltransferase (EC 2.4.1.56); phosphatidylinositol alpha-mannosyltransferase (EC 2.4.1.57); GDP-Man: Man1GlcNAc2-PP-dolichol alpha-1,3-mannosyltransferase (EC 2.4.1.132); GDP-Man: Man3GlcNAc2-PP-dolichol/Man4GlcNAc2-PP-dolichol alpha-1,2-mannosyltransferase (EC 2.4.1.131); digalactosyldiacylglycerol synthase (EC 2.4.1.141); 1,2-diacylglycerol 3-glucosyltransferase (EC 2.4.1.157); diglucosyl diacylglycerol synthase (EC 2.4.1.208); trehalose phosphorylase (EC 2.4.1.231); NDP-Glc: alpha-glucose alpha-glucosyltransferase / alpha,alpha-trehalose synthase (EC 2.4.1.245); GDP-Man: Man2GlcNAc2-PP-dolichol alpha-1,6-mannosyltransferase (EC 2.4.1.257); UDP-GlcNAc: 2-deoxystreptamine alpha-N-acetylglucosaminyltransferase (EC 2.4.1.283); UDP-GlcNAc: ribostamycin alpha-N-acetylglucosaminyltransferase (EC 2.4.1.285); UDP-Gal alpha-galactosyltransferase (EC 2.4.1.-); UDP-Xyl alpha-xylosyltransferase (EC 2.4.2.-); UDP-GlcA alpha-glucuronyltransferase (EC 2.4.1.-); UDP-Glc alpha-glucosyltransferase (EC 2.4.1.-); UDP-GalNAc: GalNAc-PP-Und alpha-1,3-N-acetylgalactosaminyltransferase (EC 2.4.1.306); UDP-GalNAc: N,N'-diacetylbacillosaminyl-PP-Und alpha-1,3-N-acetylgalactosaminyltransferase (EC 2.4.1.290) | 5 |
| UDP-Glc: glycogen glucosyltransferase (EC 2.4.1.11); ADP-Glc: starch glucosyltransferase (EC 2.4.1.21); NDP-Glc: starch glucosyltransferase (EC 2.4.1.242); UDP-Glc: alpha-1,3-glucan synthase (EC 2.4.1.183) UDP-Glc: alpha-1,4-glucan synthase (EC 2.4.1.-) | 1 |
| UDP-GlcA: beta-glucuronosyltransferase (EC 2.4.1.17) | 1 |
| undecaprenyl phosphate-alpha-L-Ara4N: 4-amino-4-deoxy-beta-L-arabinosyltransferase (EC 2.4.2.43); dodecaprenyl phosphate-beta-galacturonic acid: lipopolysaccharide core alpha-galacturonosyl transferase (EC 2.4.1.-) | 3 |
| rhamnogalacturonan lyase (EC 4.2.2.-). | 1 |

**Table S4.** Metabolic gene cluster type table for strain P47F4

|  | terpene | NAPAA | Rbetalactone | RRE-containing | T3PKS |
| --- | --- | --- | --- | --- | --- |
| P47F4 | 18 | 55 | 24 | 20 | 37 |

**Table S5**.Genes of strain P47F4 potentially related with VFDB (Virulence Factors of Pathogenic Bacteria)

| **VFDB** |  | **VF Info** | **Gene count** | **Keyword** |
| --- | --- | --- | --- | --- |
| VFG000036 | bplC | lipopolysaccharide biosynthesis protein | 1 | Endotoxin |
| VFG000037 | bplB | probable acetyltransferase | 1 | Endotoxin |
| VFG000038 | bplA | probable oxidoreductase | 1 | Endotoxin |
| VFG000042 | bscT | Bordetella Bsc type III secretion system protein BscT | 1 | Secretion system; Type III secretion system |
| VFG000071 | mpl | Zinc metalloproteinase precursor | 1 | Exoenzyme; Zinc metalloproteinase |
| VFG000077 | clpP | ATP-dependent Clp protease proteolytic subunit | 2 | Stress protein |
| VFG000119 | algR | alginate biosynthesis regulatory protein AlgR | 4 | Antiphagocytosis; Serum resistance |
| VFG000122 | algD | GDP-mannose 6-dehydrogenase AlgD | 1 | Antiphagocytosis; Serum resistance |
| VFG000157 | plcH | hemolytic phospholipase C precursor | 1 | Toxin; Membrane-damaging; Phospholipase |
| VFG000161 | pvdD | pyoverdine synthetase D | 1 | Iron uptake; Siderophore; Pigment |
| VFG000168 | pchD | pyochelin biosynthesis protein PchD | 1 | Iron uptake; Siderophore |
| VFG000171 | pchA | salicylate biosynthesis isochorismate synthase PchA | 1 | Iron uptake; Siderophore |
| VFG000249 | fbpB | iron(III) ABC transporter, permease protein | 1 | Iron uptake; ABC transporter |
| VFG000258 | ctrD | capsule polysaccharide export ATP-binding protein CtrD | 1 | Antiphagocytosis |
| VFG000269 | ureA | urease alpha subunit UreA | 1 | Enzyme; Acid resistance; Colonization |
| VFG000270 | ureB | urease beta subunit UreB, urea amidohydrolase | 1 | Enzyme; Acid resistance; Colonization |
| VFG000274 | ureG | urease accessory protein (ureG) | 1 | Enzyme; Acid resistance; Colonization |
| VFG000320 | kdtB | lipopolysaccharide core biosynthesis protein | 1 | Endotoxin; Low toxicity; Adherence |
| VFG000344 | hitC | iron(III) ABC transporter, ATP-binding protein | 4 | Iron uptake; ABC transporter |
| VFG000365 | ybtP | lipoprotein inner membrane ABC-transporter | 1 | Iron uptake; Siderophore |
| VFG000366 | ybtQ | inner membrane ABC-transporter YbtQ | 2 | Iron uptake; Siderophore |
| VFG000574 | mgtB | Mg2+ transport protein | 4 | Magnesium uptake |
| VFG000841 | hlyB | hemolysin transport protein | 1 | Toxin; Membrane-damaging; Pore-forming; RTX toxin |
| VFG000872 | fimE | Type 1 fimbriae Regulatory protein fimE | 1 | Adherence; Invasion |
| VFG000907 | hlyB | Hemolysin B | 2 | Toxin; Membrane-damaging; Pore-forming; RTX toxin |
| VFG000925 | fepC | ferrienterobactin ABC transporter ATPase | 1 | Iron uptake; Siderophore |
| VFG000932 | entE | 2,3-dihydroxybenzoate-AMP ligase component of enterobactin synthase multienzyme complex | 1 | Iron uptake; Siderophore |
| VFG000964 | hasC | UDP-glucose pyrophosphorylase | 1 | Antiphagocytosis; Adherence; Tissue invasion |
| VFG001008 | spa47 | type III secretion system ATPase spa47 | 1 | Secretion system; Type III secretion system; Invasion |
| VFG001205 | fbpA | iron(III) ABC transporter, periplasmic binding protein | 1 | Iron uptake; ABC transporter |
| VFG001206 | fbpC | iron(III) ABC transporter, ATP-binding protein | 8 | Iron uptake; ABC transporter |
| VFG001214 | pilR | two-component response regulator PilR | 1 | Adherence; Twitching motility |
| VFG001231 | chpA | still frameshift probable component of chemotactic signal transduction system | 1 | Adherence; Twitching motility |
| VFG001238 | flgE | flagellar hook protein FlgE | 1 | Adherence; Motility |
| VFG001246 | fliC | B-type flagellin | 1 | Adherence; Motility |
| VFG001266 | pchI | ABC transporter ATP-binding protein | 2 | Iron uptake; Siderophore |
| VFG001267 | pchH | ABC transporter ATP-binding protein | 3 | Iron uptake; Siderophore |
| VFG001269 | cyaB | cyclolysin secretion ATP-binding protein | 3 | Toxin; Adenylate cyclase; RTX toxin |
| VFG001312 | cap8P | capsular polysaccharide synthesis enzyme Cap8P | 1 | Antiphagocytosis |
| VFG001352 | cpsA | CpsA responsible for transfer of CPS from the membrane lipid to the cell wall peptidoglycan | 1 | Antiphagocytosis; Serum resistance |
| VFG001381 | icl | Isocitrate lyase Icl (isocitrase) (isocitratase) | 1 | Cellular metabolism |
| VFG001386 | phoP | Possible two component system response transcriptional positive regulator PhoP | 4 | Regulation |
| VFG001397 | hspX | Heat shock protein HspX (alpha-crystallin homolog) (14 kDa antigen) (HSP16.3) | 2 | Heat-shock protein |
| VFG001406 | ideR | Iron-dependent repressor and activator IdeR | 1 | Regulation |
| VFG001442 | ibeA | invasion protein IbeA | 1 | Invasion |
| VFG001826 | relA | Probable GTP pyrophosphokinase RelA (ATP:GTP 3'-pyrophosphotransferase) (PPGPP synthetase I) ((P)PPGPP synthetase) (GTP diphosphokinase) | 1 | Regulation |
| VFG001855 | htpB | Hsp60, 60K heat shock protein HtpB | 2 | Adherence |
| VFG001915 | fliP | flagellar biosynthesis protein FliP | 1 | Motility; Chemotaxis; Invasion; Phase variation |
| VFG001947 | waaV | glucosyltransferase | 1 | Adherence; Phase variation; Structural mimicry |
| VFG001965 | Cj1437c | aminotransferase | 1 | Adherence; Phase variation |
| VFG001967 | glf | UDP-galactopyranose mutase | 1 | Adherence; Phase variation |
| VFG001974 | kpsT | capsule polysaccharide export ATP-binding protein | 1 | Adherence; Phase variation |
| VFG001991 | flgB | flagellar basal body rod protein FlgB | 1 | Motility |
| VFG001992 | flgC | flagellar basal body rod protein FlgC | 1 | Motility |
| VFG002059 | tagT | type six secretion associated protein TagT, ATP-binding component of ABC transporter | 3 | Secretion system; Type VI secretion system |
| VFG002060 | ppkA | serine/threonine protein kinase PpkA | 2 | Secretion system; Type VI secretion system |
| VFG002061 | pppA | Pseudomonas protein phosphatase PppA | 1 | Secretion system; Type VI secretion system |
| VFG002176 | cylB | ABC-type transporter | 1 | Toxin; Hemolysin/bacteriocin; Biofilm formation |
| VFG002190 | cpsA | undecaprenyl diphosphate synthase | 2 | Antiphagocytosis |
| VFG002197 | bopD | sugar-binding transcriptional regulator, LacI family | 2 | Biofilm formation |
| VFG002224 | wbkA | mannosyltransferase | 1 | Intracellular survival; Intracellular entry; Immuno-modulatory activity |
| VFG002226 | per | perosamine synthetase | 1 | Intracellular survival; Intracellular entry; Immuno-modulatory activity |
| VFG002240 | virB11 | type IV secretion system virB11 protein homolog | 1 | Secretion system; Type IV secretion system |
| VFG002319 | fliA | flagellar biosynthesis sigma factor | 1 | Secretion system; Invasion; Motility |
| VFG002328 | fliF | flagellar M-ring protein FliF | 1 | Secretion system; Invasion; Motility |
| VFG002331 | fliI | flagellum-specific ATP synthase FliI | 1 | Secretion system; Invasion; Motility |
| VFG002339 | fliQ | flagellar biosynthetic protein FliQ | 1 | Secretion system; Invasion; Motility |
| VFG002357 | flhB | flagellar biosynthetic protein FlhB | 1 | Secretion system; Invasion; Motility |
| VFG002361 | galE | UDP-glucose 4-epimerase | 1 | - |
| VFG002362 | manB | phosphomannomutase | 1 | - |
| VFG002363 | manC | mannose-1-phosphate guanylyltransferase | 1 | - |
| VFG002365 | gmd | GDP-mannose 4,6-dehydratase | 2 | - |
| VFG002368 | wbcG | putative glycosyltransferase | 1 | - |
| VFG002391 | mycP1 | ESX-1 type VII secretion system subtilisin-like serine protease MycP1 | 1 | Secretion system; Type VII secretion system |
| VFG002440 | bprB | two-component response regulator | 2 | Secretion system; Type III secretion system; Invasion |
| VFG002480 | tssH-5/clpV | Clp-type ATPase chaperone protein | 3 | Secretion system; Type VI secretion system |
| VFG002548 | wcbR | capsular polysaccharide biosynthesis fatty acid synthase | 1 | Antiphagocytosis |
| VFG002563 | wzt2 | ATP-binding ABC transporter capsular polysaccharide export protein | 1 | Antiphagocytosis |
| VFG005767 | cylG | 3-ketoacyl-ACP-reductase CylG | 5 | - |
| VFG005776 | cylA | ABC (ATP-binding cassette) transporter CylA | 3 | - |
| VFG006577 | flhA | flagellar biosynthesis protein | 1 | - |
| VFG007023 | rtxB | RTX toxin transporter RtxB | 1 | - |
| VFG009570 | irtA | Iron-regulated transporter IrtA | 2 | - |
| VFG009579 | irtB | Iron-regulated transporter IrtB | 2 | - |
| VFG009810 | phoR | Possible two component system response sensor kinase membrane associated PhoR | 4 | - |
| VFG012509 | iroC | ATP binding cassette transporter | 7 | - |
| VFG013070 | shuV | ATP-binding component of hemin transport system | 2 | Iron uptake; Heme uptake |
| VFG013248 | msbA | lipid transporter ATP-binding/permease | 2 | - |
| VFG013265 | orfM | deoxyribonucleotide triphosphate pyrophosphatase | 1 | - |
| VFG013286 | galE | UDP-glucose 4-epimerase | 2 | - |
| VFG013327 | yhxB/manB | phosphomannomutase | 3 | - |
| VFG013368 | rffG | dTDP-glucose 46-dehydratase | 2 | - |
| VFG013508 | wecA | undecaprenyl-phosphate alpha-N-acetylglucosaminyltransferase | 1 | - |
| VFG014707 | motC | flagellar motor protein | 1 | - |
| VFG014984 | algW | AlgW protein | 2 | - |
| VFG015509 | phzC1 | phenazine biosynthesis protein PhzC | 1 | - |
| VFG015518 | phzF1 | phenazine biosynthesis protein PhzF, isomerase | 1 | - |
| VFG016041 | pvdI | peptide synthase | 1 | - |
| VFG022051 | eccC3 | Type VII secretion system protein EccC3 | 1 | Secretion system; Type VII secretion system |
| VFG032992 | oatA | peptidoglycan O-acetyltransferase | 3 | Immune evasion |
| VFG036956 | farB | fatty acid efflux system protein FarB | 2 | Efflux pump |
| VFG036992 | mtrD | multiple transferable resistance system protein MtrD | 1 | Efflux pump |
| VFG037028 | katA | catalase | 1 | Stress protein |
| VFG037082 | mntC | periplasmic binding protein MntC | 1 | Stress protein |
| VFG037100 | msrA/B(pilB) | trifunctional thioredoxin/methionine sulfoxide reductase A/B protein | 2 | Stress protein |
| VFG037118 | recN | DNA repair protein RecN | 1 | Stress protein |
| VFG037316 | entE | enterobactin synthase subunit E | 1 | Iron uptake; Siderophore |
| VFG037386 | bauE | enterochelin ABC transporter ATPase | 1 | Iron uptake; Siderophore |
| VFG038524 | flpH | Flp pilus assembly protein TadC | 2 | - |
| VFG038532 | flpF | protein CpaF | 2 | - |
| VFG038630 | fliG | flagellar motor switch protein G | 1 | - |
| VFG038686 | flhF | flagellar biosynthesis protein FlhF | 1 | - |
| VFG038710 | cheB-2 | chemotaxis-specific methylesterase | 1 | - |
| VFG038722 | AHA_1389 | CobQ/CobB/MinD/ParA family protein | 3 | - |
| VFG038839 | flmH | short chain dehydrogenase/reductase family oxidoreductase | 7 | - |
| VFG038900 | hlyA | transporter | 1 | - |
| VFG041304 | lirB | Dot/Icm type IV secretion system effector LirB | 1 | - |
| VFG043350 | fleN | flagellar synthesis regulator FleN | 1 | - |
| VFG043398 | flgS | signal transduction histidine kinase | 1 | - |
| VFG044081 | pvcC | paerucumarin biosynthesis protein PvcC | 1 | - |
| VFG044165 | entS | enterobactin exporter, iron-regulated | 1 | - |
| VFG044172 | chuV | ATP-binding hydrophilic protein ChuV | 2 | Iron uptake; Heme uptake |
| VFG044336 | iroC | putative ABC transporter | 7 | - |

**Table S6.**Genes of strain P47F4 potentially associated with the Comprehensive Antibiotic Resistance Database (CARD).

| CARD | gene | Gene count | Gene Family |
| --- | --- | --- | --- |
| ARO:3000025 | patB | 1 | ATP-binding cassette (ABC) antibiotic efflux pump |
| ARO:3000195 | tetB(P) | 1 | tetracycline-resistant ribosomal protection protein |
| ARO:3000245 | RbpA | 1 | RbpA bacterial RNA polymerase-binding protein |
| ARO:3000421 | norB | 1 | major facilitator superfamily (MFS) antibiotic efflux pump |
| ARO:3000448 | QepA1 | 1 | major facilitator superfamily (MFS) antibiotic efflux pump |
| ARO:3000478 | tet(33) | 1 | major facilitator superfamily (MFS) antibiotic efflux pump |
| ARO:3000504 | golS | 1 | resistance-nodulation-cell division (RND) antibiotic efflux pump |
| ARO:3000535 | macB | 3 | ATP-binding cassette (ABC) antibiotic efflux pump |
| ARO:3000553 | adeR | 1 | resistance-nodulation-cell division (RND) antibiotic efflux pump |
| ARO:3000556 | tet(44) | 1 | tetracycline-resistant ribosomal protection protein |
| ARO:3000573 | tet(43) | 3 | major facilitator superfamily (MFS) antibiotic efflux pump |
| ARO:3000594 | ErmR | 1 | Erm 23S ribosomal RNA methyltransferase |
| ARO:3000811 | mtrD | 1 | resistance-nodulation-cell division (RND) antibiotic efflux pump |
| ARO:3000815 | mgrA | 1 | ATP-binding cassette (ABC) antibiotic efflux pump;major facilitator superfamily (MFS) antibiotic efflux pump |
| ARO:3000829 | baeS | 2 | resistance-nodulation-cell division (RND) antibiotic efflux pump |
| ARO:3000830 | cpxA | 2 | resistance-nodulation-cell division (RND) antibiotic efflux pump |
| ARO:3000832 | evgA | 5 | major facilitator superfamily (MFS) antibiotic efflux pump;resistance-nodulation-cell division (RND) antibiotic efflux pump |
| ARO:3000833 | evgS | 1 | major facilitator superfamily (MFS) antibiotic efflux pump;resistance-nodulation-cell division (RND) antibiotic efflux pump |
| ARO:3000839 | arlS | 1 | major facilitator superfamily (MFS) antibiotic efflux pump |
| ARO:3001300 | myrA | 1 | non-erm 23S ribosomal RNA methyltransferase (G748) |
| ARO:3001313 | facT | 3 | major facilitator superfamily (MFS) antibiotic efflux pump |
| ARO:3002522 | novA | 7 | ATP-binding cassette (ABC) antibiotic efflux pump |
| ARO:3002701 | Rhodococcus fascians cmr | 1 | major facilitator superfamily (MFS) antibiotic efflux pump |
| ARO:3002813 | lmrB | 2 | ATP-binding cassette (ABC) antibiotic efflux pump |
| ARO:3002817 | carA | 6 | Miscellaneous ABC-F subfamily ATP-binding cassette ribosomal protection proteins |
| ARO:3002827 | tlrC | 1 | Miscellaneous ABC-F subfamily ATP-binding cassette ribosomal protection proteins |
| ARO:3002828 | srmB | 1 | Miscellaneous ABC-F subfamily ATP-binding cassette ribosomal protection proteins |
| ARO:3002830 | vgaALC | 1 | vga-type ABC-F protein |
| ARO:3002833 | vgaE | 1 | vga-type ABC-F protein |
| ARO:3002881 | lmrC | 1 | Miscellaneous ABC-F subfamily ATP-binding cassette ribosomal protection proteins |
| ARO:3002882 | lmrD | 1 | ATP-binding cassette (ABC) antibiotic efflux pump |
| ARO:3002884 | iri | 1 | rifampin monooxygenase |
| ARO:3002891 | Streptomyces rimosus otr(A) | 1 | tetracycline-resistant ribosomal protection protein |
| ARO:3002892 | otr(B) | 3 | major facilitator superfamily (MFS) antibiotic efflux pump |
| ARO:3002893 | tcr3 | 1 | major facilitator superfamily (MFS) antibiotic efflux pump |
| ARO:3002894 | otr(C) | 4 | ATP-binding cassette (ABC) antibiotic efflux pump |
| ARO:3002911 | vanM | 1 | Van ligase;glycopeptide resistance gene cluster |
| ARO:3002923 | vanR gene in vanD cluster | 1 | glycopeptide resistance gene cluster;vanR |
| ARO:3002924 | vanR gene in vanE cluster | 2 | glycopeptide resistance gene cluster;vanR |
| ARO:3002926 | vanR gene in vanG cluster | 4 | glycopeptide resistance gene cluster;vanR |
| ARO:3002929 | vanR gene in vanN cluster | 1 | glycopeptide resistance gene cluster;vanR |
| ARO:3002944 | vanH gene in vanD cluster | 1 | glycopeptide resistance gene cluster;vanH |
| ARO:3002948 | vanH gene in vanO cluster | 1 | glycopeptide resistance gene cluster;vanH |
| ARO:3002956 | vanY gene in vanB cluster | 1 | glycopeptide resistance gene cluster;vanY |
| ARO:3002972 | vanT gene in vanG cluster | 1 | glycopeptide resistance gene cluster;vanT |
| ARO:3003007 | bmr | 1 | major facilitator superfamily (MFS) antibiotic efflux pump |
| ARO:3003016 | dfrA20 | 1 | trimethoprim resistant dihydrofolate reductase dfr |
| ARO:3003036 | oleB | 9 | Miscellaneous ABC-F subfamily ATP-binding cassette ribosomal protection proteins |
| ARO:3003046 | qacA | 1 | major facilitator superfamily (MFS) antibiotic efflux pump |
| ARO:3003066 | smeR | 1 | resistance-nodulation-cell division (RND) antibiotic efflux pump |
| ARO:3003109 | msrE | 1 | msr-type ABC-F protein |
| ARO:3003583 | basS | 1 | pmr phosphoethanolamine transferase |
| ARO:3003730 | Bifidobacterium bifidum ileS conferring resistance to mupirocin | 3 | antibiotic-resistant isoleucyl-tRNA synthetase (ileS) |
| ARO:3003748 | oleC | 3 | ATP-binding cassette (ABC) antibiotic efflux pump |
| ARO:3003785 | Chlamydia trachomatis intrinsic murA conferring resistance to fosfomycin | 1 | antibiotic-resistant murA transferase |
| ARO:3003841 | kdpE | 1 | kdpDE |
| ARO:3003843 | leuO | 1 | major facilitator superfamily (MFS) antibiotic efflux pump |
| ARO:3003948 | efrA | 2 | ATP-binding cassette (ABC) antibiotic efflux pump |
| ARO:3003950 | msbA | 2 | ATP-binding cassette (ABC) antibiotic efflux pump |
| ARO:3003967 | lfrA | 1 | major facilitator superfamily (MFS) antibiotic efflux pump |
| ARO:3003980 | tetA(58) | 6 | major facilitator superfamily (MFS) antibiotic efflux pump |
| ARO:3003986 | TaeA | 3 | ATP-binding cassette (ABC) antibiotic efflux pump |
| ARO:3003992 | rphB | 2 | rifampin phosphotransferase |
| ARO:3004032 | tetA(46) | 2 | ATP-binding cassette (ABC) antibiotic efflux pump |
| ARO:3004033 | tetB(46) | 1 | ATP-binding cassette (ABC) antibiotic efflux pump |
| ARO:3004035 | tetA(60) | 7 | ATP-binding cassette (ABC) antibiotic efflux pump |
| ARO:3004047 | kdpD | 1 | kdpDE |
| ARO:3004054 | Pseudomonas aeruginosa CpxR | 2 | resistance-nodulation-cell division (RND) antibiotic efflux pump |
| ARO:3004361 | sul4 | 1 | sulfonamide resistant sul |
| ARO:3004379 | QepA4 | 1 | major facilitator superfamily (MFS) antibiotic efflux pump |
| ARO:3004476 | vmlR | 4 | Miscellaneous ABC-F subfamily ATP-binding cassette ribosomal protection proteins |
| ARO:3004480 | Bifidobacterium adolescentis rpoB mutants conferring resistance to rifampicin | 1 | rifamycin-resistant beta-subunit of RNA polymerase (rpoB) |
| ARO:3004571 | PNGM-1 | 1 | PNGM beta-lactamase |
| ARO:3004572 | Staphylococcus aureus LmrS | 1 | major facilitator superfamily (MFS) antibiotic efflux pump |
| ARO:3004573 | Acinetobacter baumannii AbaF | 16 | major facilitator superfamily (MFS) antibiotic efflux pump |
| ARO:3004574 | Acinetobacter baumannii AbaQ | 3 | major facilitator superfamily (MFS) antibiotic efflux pump |
| ARO:3004577 | Acinetobacter baumannii AmvA | 1 | major facilitator superfamily (MFS) antibiotic efflux pump |
| ARO:3004715 | vga(E) Staphylococcus cohnii | 2 | vga-type ABC-F protein |
| ARO:3005021 | cfr(D) | 1 | Cfr 23S ribosomal RNA methyltransferase |
| ARO:3005068 | ParR | 2 | Outer Membrane Porin (Opr);resistance-nodulation-cell division (RND) antibiotic efflux pump |
| ARO:3005069 | rsmA | 1 | resistance-nodulation-cell division (RND) antibiotic efflux pump |
| ARO:3005121 | lsaD | 1 | lsa-type ABC-F protein |
| ARO:3006260 | ACT-65 | 1 | ACT beta-lactamase |
| ARO:3006882 | ECM-1 | 1 | ECM beta-lactamase |
| ARO:3007050 | mreA | 1 | major facilitator superfamily (MFS) antibiotic efflux pump |
| ARO:3007188 | vanH gene in vanP cluster | 2 | glycopeptide resistance gene cluster;vanH |
| ARO:3007208 | HelR | 1 | helicase-like RNA polymerase protection protein |
| ARO:3007209 | Streptomyces venezuelae rox | 1 | rifampin monooxygenase |
| ARO:3007210 | Nocardia farcinica rox | 1 | rifampin monooxygenase |
